# Supplementary material for: Two-stage group-sequential designs with delayed responses – what is the point of applying corresponding methods?
Source: PubMed Central journal article supplement (PMC11484224; doi:10.1186/s12874-024-02363-7), 2024-10-17
Supplement: 12874_2024_2363_MOESM1_ESM.pdf [file 12874_2024_2363_MOESM1_ESM.pdf]

1 Appendix for the manuscript “Two-stage group-  
2 sequential designs with delayed responses – what  
3 is the point of applying corresponding methods?”

4 Stephen Schüürhuis<sup>1\*</sup>, Gernot Wassmer<sup>2</sup>, Meinhard Kieser<sup>3</sup>,  
5 Friedrich Pahlke<sup>2</sup>, Cornelia Ursula Kunz<sup>4</sup>, Carolin Herrmann<sup>1</sup>

6 <sup>1\*</sup>Institute of Biometry and Clinical Epidemiology, Charité -  
7 Universitätsmedizin Berlin, Corporate member of Freie Universität  
8 Berlin and Humboldt-Universität zu Berlin, Institute of Biometry and  
9 Clinical Epidemiology, Charitéplatz 1, Berlin, 10117, Germany.

10 <sup>2</sup>RPACT GbR, Am Rodenkathen 11, Seretz, 23611, Germany.

11 <sup>3</sup>Institute of Medical Biometry, University Medical Center  
12 Rupprechts-Karls University Heidelberg, Im Neuenheimer Feld 130.3,  
13 Heidelberg, 69120, Germany.

14 <sup>4</sup>Biostatistics and Data Sciences, Boehringer Ingelheim GmbH & Co.  
15 KG, Birkendorfer Straße 65, Biberach an der Riß, 88400, Germany.

16 \*Corresponding author(s). E-mail(s): [stephen.schueuerhuis@charite.de](mailto:stephen.schueuerhuis@charite.de);

17 **Appendix A Considered spending functions for  $\alpha$**   
 18 **and  $\beta$**

19 In this paper, we explore  $\alpha$ - and  $\beta$ -spending functions, denoted as  $a_{OF}(\cdot)$ ,  $b_{OF}(\cdot)$ ,  
 20  $a_P(\cdot)$ , and  $b_P(\cdot)$ , to derive group-sequential boundary sets. The functions with the  
 21 index  $OF$  represent O'Brien-Fleming-like spending functions, while those with the  
 22 index  $P$  represent Pocock-like spending functions:

$$\begin{aligned}
 a_{OF}(I) &= \min \left\{ \mathbb{1}_{\{I>0\}} \cdot 2 \left( 1 - \Phi \left( \frac{\Phi^{-1}(1 - \frac{\alpha}{2})}{\sqrt{I}} \right) \right), \alpha \right\}, \\
 b_{OF}(I) &= \min \left\{ \mathbb{1}_{\{I>0\}} \cdot 2 \left( 1 - \Phi \left( \frac{\Phi^{-1}(1 - \frac{\beta}{2})}{\sqrt{I}} \right) \right), \beta \right\}, \\
 a_P(I) &= \min \{ \alpha(\ln(1 + (e - 1)I)), \alpha \}, \\
 b_P(I) &= \min \{ \beta(\ln(1 + (e - 1)I)), \beta \}.
 \end{aligned}$$

23 Here, the function  $\mathbb{1}_{\{I>0\}}$  is the indicator function is defined as

$$\mathbb{1}_{\{I>0\}} = \begin{cases} 1 & \text{if } I > 0 \\ 0 & \text{otherwise.} \end{cases}$$

24 While the application of O'Brien-Fleming-like spending functions results in monoton-  
 25 ically decreasing upper boundaries, the utilization of Pocock-like spending functions  
 26 corresponds to approximately constant upper boundaries.

## 27 Appendix B Conditional performance measures

28 Conditional performance characteristics are based on conditioning on scenarios only  
29 where the interim test statistic suggest neither stopping early for efficacy nor for futil-  
30 ity, but trial continuation. Hence, performance is conditioned on the interim results.  
31 A prominent example for a conditional performance criterion is the conditional power  
32  $CP$

$$CP_{\delta=\tilde{\delta}}(z_1) = 1 - \Phi \left( u_2 \cdot \frac{\sqrt{w_1^2 + w_2^2}}{w_2} - z_1 \cdot \frac{w_1}{w_2} - \tilde{\delta} \sqrt{\frac{n - n_1}{2}} \right),$$

33 where  $w_1$  and  $w_2$  are weights typically chosen proportional to the planned sample size,  
34  $u_2$  denotes the critical values,  $z_1$  the observed test statistic at interim and  $\tilde{\delta}$  some effect  
35 under which the conditional power should be evaluated. Moreover,  $\Phi^{-1}(\cdot)$  denotes the  
36 cumulative distribution function of a standard normal distribution. Another example  
37 is the expected conditional sample size

$$\mathbb{E}[CN] = \mathbb{E}[N|Z_1 \in (l_1, u_1)],$$

38 where  $N = n_1 + n_2(Z_1)$  denotes the random overall sample size. Note that the con-  
39 ditional sample size is a constant value in the case of classical group sequential trial  
40 designs since it is always the same number of patients that is recruited in the sec-  
41 ond stage if the trial continues. Especially for the conditional power it makes sense to  
42 also report a measure of variation next to describing its location since the conditional  
43 power value varies depending on the observed interim test statistic. This is also taken  
44 into account in the performance score by Herrmann et al. [24] The conditional perfor-  
45 mance score measures the performance using conditional power  $CP$  and conditional  
46 sample size  $CN$  both with respect to location  $e$  and variation  $v$  in dependence of an  
47 underlying effect size  $\delta$ . The location components, denoted as  $S_{e,CP}$  and  $S_{e,CN}$  in the

48 following, describe the difference of the observed average conditional power or sample  
 49 size compared to a target conditional power and sample size and set this in relation  
 50 to the maximally possible deviation in conditional power or sample size:

$$S_{e,CP} = 1 - \frac{\mathbb{E}[CP(Z_1)] - CP_{target}}{CP_{max} - CP_{min}},$$

$$S_{e,CN} = 1 - \frac{\mathbb{E}[CN(Z_1)] - CN_{target}}{CN_{max} - CN_{min}}.$$

51 For the target values and maximally possible deviations  $CP_{target}, CN_{target}, CP_{max}$   
 52 and  $CN_{max}$ , we refer to the table in the Appendix C. For the variation components  
 53  $S_{v,CP}$  and  $S_{v,CN}$ , the observed variance of the conditional power or sample size is  
 54 related to the maximally possible variance value (see Appendix C):

$$S_{v,CP} = 1 - \sqrt{\frac{Var(CP(Z_1))}{Var_{max}(CP(Z_1))}},$$

$$S_{v,CN} = 1 - \sqrt{\frac{Var(CN(Z_1))}{Var_{max}(CN(Z_1))}}.$$

55 Note that all score components are designed to range between  $[0, 1]$ , with higher values  
 56 indicating performances that are closer to the optimal outcomes. Finally, the condi-  
 57 tional performance score  $CS$  can be defined as a weighted sum of all components, that  
 58 is

$$CS = w_{e,CN} \cdot S_{e,CN} + w_{v,CN} \cdot S_{v,CN} + w_{e,CP} \cdot S_{e,CP} + w_{v,CP} \cdot S_{v,CP},$$

59 where  $w_{e,CN}, w_{v,CN}, w_{e,CP}, w_{v,CP}$  denote the weights for the different components.  
 60 It is intuitive to use an equal weighting following, i.e.,  $w_{e,CN} = w_{v,CN} = w_{e,CP} =$   
 61  $w_{v,CP} = 0.25$  but in principle a different weighting is also possible. Since all individual  
 62 components are constructed such that a performance score value close to 0 refers

63 to a poor performance and a value close to 1 to an extraordinary performance, the  
64 same applies also to the overall performance score value. The conditional performance  
65 score is based on the expected values and variances of the random variables  $CP$   
66 and  $CN$ , which inherit the randomness from  $Z_1$ . Given that no explicit closed-form  
67 expression for the distributions of  $CP$  and  $CN$  exists yet, the performance score must  
68 be calculated via simulation. An initial implementation of the conditional performance  
69 score is provided in the function `getPerformanceScore` within the `rpact` software  
70 package. This function takes a simulation result as input and outputs the components  
71 of the performance score.

72 Even though the conditional performance score was primarily defined for adap-  
73 tive group sequential trial designs, it can also be applied to classic group sequential  
74 trial designs. As suggested in the manuscript, with some very minor modifications,  
75 the conditional performance score can also be applied to designs which account for  
76 delayed responses. We recommend only a comparison among binding futility stopping  
77 designs or among non-binding futility stopping designs since otherwise the condition  
78 underlying the conditional performance score is different. The minor modifications  
79 apply only to the reference values regarding the sample size where all  $n_1$  values need  
80 to be replaced by  $n_1 + n_{\Delta_t}$ , i.e., the maximally possible difference in sample size  
81 becomes  $n_{max} - (n_1 + n_{\Delta_t})$  instead of  $n_{max} - n_1$  and the maximally possible variance  
82 as  $((n_{max} - n_1 - n_{\Delta_t})/2)^2$  instead of  $((n_{max} - n_1)/2)^2$ . The power target values are  
83 exactly the same. A complete summary of the reference values for designs accounting  
84 for delayed responses can be found in the table in the Appendix C. Note that, as with  
85 the original performance score, the  $S_{CN}$  component is somewhat useless when only  
86 comparing classic group sequential trial designs among each other. On one hand, the  
87 variance component will always be a constant 1, as the second-stage sample size is  
88 fixed conditioned on proceeding to the second stage. Thus, it consistently achieves the  
89 optimal value of 1. For the location component, its value depends on the sample size

90 required for a fixed design, denoted as  $n_{\text{fix},\delta}$  (see Appendix C). If  $n_{\text{fix},\delta}$  exceeds  $n_{\text{max}}$ ,  
91 the location component will also be 1. However, if  $n_{\text{fix},\delta} < n_{\text{max}}$ , the location compo-  
92 nent could become negative, particularly if  $n_{\text{fix},\delta} < n_1 + n_{\Delta_t}$ . To still leave room for a  
93 potential comparison with adaptive designs, however, we do not omit this component  
94 here. Further, note that the original definition of the conditional performance score  
95 was assuming immediate outcome measurements. However, when this is not the case,  
96 i.e. when pipeline data exist, the target value definition is naturally adapted. Hence,  
97 the only performance difference can be noted from the global perspective.

98 **Appendix C Target values for the conditional**  
99 **performance score**

| Performance measure | $C^{*target}$<br>for $n_{fix,\delta} \leq n_{max}$<br>and $\delta \neq 0$ | $C^{*target}$<br>for $n_{fix,\delta} > n_{max}$<br>or $\delta = 0$ | $C^{*max} - C^{*min}$            | $Var_{max}$                            |
|---------------------|---------------------------------------------------------------------------|--------------------------------------------------------------------|----------------------------------|----------------------------------------|
| No pipeline data    |                                                                           |                                                                    |                                  |                                        |
| $CN$                | $n_{fix,\delta}$                                                          | $n_1$                                                              | $n_{max} - n_1$                  | $((n_{max} - n_1)/2)^2$                |
| $CP$                | $1 - \beta$                                                               | $\alpha$                                                           | $1 - \alpha$                     | $((1 - 0)/2)^2$                        |
| With pipeline data  |                                                                           |                                                                    |                                  |                                        |
| $CN$                | $n_{fix,\delta}$                                                          | $n_1 + n_{\Delta_t}$                                               | $n_{max} - (n_1 + n_{\Delta_t})$ | $((n_{max} - n_1 - n_{\Delta_t})/2)^2$ |
| $CP$                | $1 - \beta$                                                               | $\alpha$                                                           | $1 - \alpha$                     | $((1 - 0)/2)^2$                        |

100 **Appendix D** Examples of boundaries for the four  
101 considered designs

**Table D1:** Boundary sets  $\{l_1, u_1, d_1, d_2\}$  for DR-GSD, GSD, and RR-GSD design with  $\alpha = 0.025$  and  $\beta = 0.2$  for  $\alpha$ - and  $\beta$ -spending functions  $a_{OF}$  and  $b_{OF}$  as well as  $a_P$  and  $b_P$

| Scenario | $\alpha$ -spending | $\beta$ -spending | $(I_1, I_2)$ | $I_{\Delta_t}$ | Method | $(l_1, u_1)$    | $d_1$ | $d_2$ |
|----------|--------------------|-------------------|--------------|----------------|--------|-----------------|-------|-------|
| 1        | $a_{OF}$           | $b_{OF}$          | (0.3, 1)     | 0.1            | DR-GSD | (-0.523, 3.929) | 1.940 | 1.960 |
|          |                    |                   |              |                | GSD    | (-0.523, 3.929) | NA    | 1.960 |
|          |                    |                   |              |                | RR-GSD | (-0.523, 3.928) | 1.960 | 1.960 |
| 2        | $a_{OF}$           | $b_{OF}$          | (0.4, 1)     | 0.2            | DR-GSD | (0.0811, 3.357) | 2.025 | 1.962 |
|          |                    |                   |              |                | GSD    | (0.0811, 3.357) | NA    | 1.962 |
|          |                    |                   |              |                | RR-GSD | (0.080, 3.342)  | 1.960 | 1.960 |
| 3        | $a_{OF}$           | $b_{OF}$          | (0.5, 1)     | 0.3            | DR-GSD | (0.559, 2.963)  | 2.074 | 1.969 |
|          |                    |                   |              |                | GSD    | (0.559, 2.963)  | NA    | 1.969 |
|          |                    |                   |              |                | RR-GSD | (0.550, 2.895)  | 1.960 | 1.965 |
| 4        | $a_P$              | $b_P$             | (0.3, 1)     | 0.1            | DR-GSD | (0.305, 2.312)  | 1.452 | 2.124 |
|          |                    |                   |              |                | GSD    | (0.305, 2.312)  | NA    | 2.124 |
|          |                    |                   |              |                | RR-GSD | (0.137, 2.123)  | 1.960 | 2.101 |
| 5        | $a_P$              | $b_P$             | (0.4, 1)     | 0.2            | DR-GSD | (0.727, 2.224)  | 1.656 | 2.165 |
|          |                    |                   |              |                | GSD    | (0.727, 2.224)  | NA    | 2.165 |
|          |                    |                   |              |                | RR-GSD | (0.422, 1.859)  | 1.960 | 2.090 |
| 6        | $a_P$              | $b_P$             | (0.5, 1)     | 0.3            | DR-GSD | (1.083, 2.157)  | 1.795 | 2.201 |
|          |                    |                   |              |                | GSD    | (1.083, 2.157)  | NA    | 2.201 |
|          |                    |                   |              |                | RR-GSD | (0.680, 1.636)  | 1.960 | 2.045 |

Abbreviations: GSD: Group-sequential design; DR-GSD: Delayed response group-sequential design; RR-GSD: Repeated rejection group-sequential design
